# Supplementary material for: Paper-based electroanalytical sensing platforms
Source: Royal Society of Chemistry journal article supplement (doi:10.1039/c2ay26396c), 2012-11-28

## ESI 1

Typical SEM images of the paper-based electrodes screen printed upon different paper substrates; A) RP-SPE and B) FP-SPE at a magnification of  $\times 35$ , whilst C) and D) show the RP-SPE and FP-SPE at an increased magnification of  $\times 1000$ .

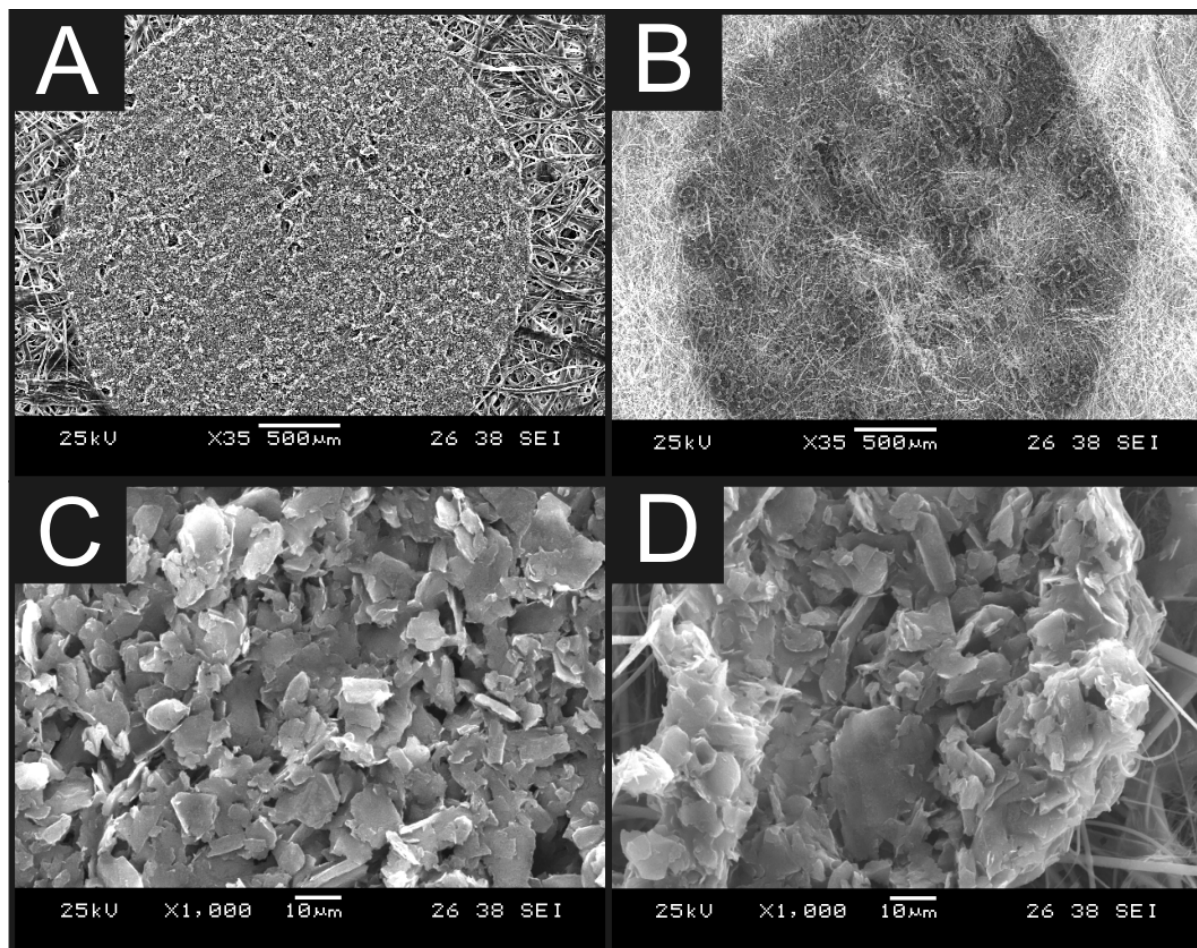

Supplement: c2ay26396c.pdf [file c2ay26396c.pdf]
